# Supplementary material for: Atorvastatin Augments Gemcitabine-Mediated Anti-Cancer Effects by Inhibiting Yes-Associated Protein in Human Cholangiocarcinoma Cells
Source: MDPI journal article supplement (doi:10.3390/ijms21207588), 2020-10-14
Supplement: s1 [file s1]

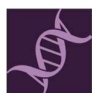

Supplementary Materials

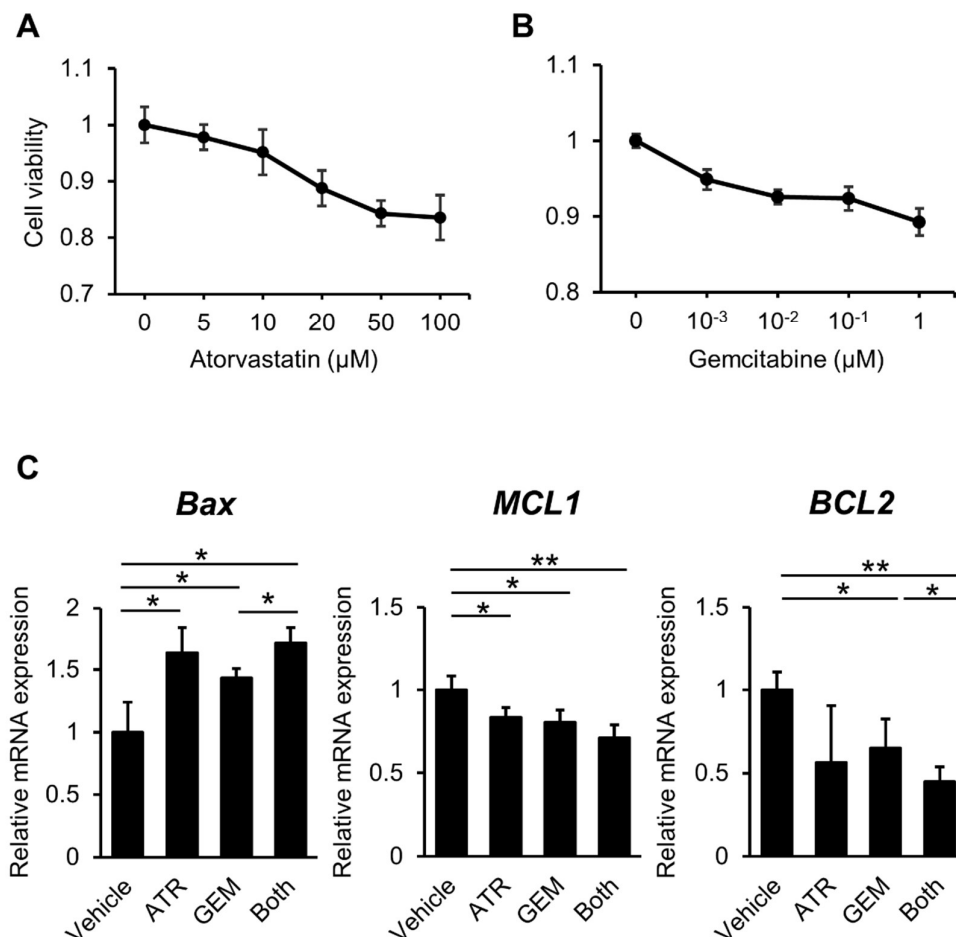

**Figure 1.** Effects of atorvastatin and gemcitabine on in vitro KKK-M213 cell growth. (A, B) Concentration-dependent effects of atorvastatin (0–100  $\mu\text{M}$ ) (A) and gemcitabine (0–1  $\mu\text{M}$ ) (B) on the growth of KKK-M213 cells. (C) Relative mRNA levels of BAX, MCL1, and BCL2 in KKK-M213 cells. The mRNA expression levels were measured using quantitative real-time PCR, and glyceraldehyde-3-phosphate dehydrogenase was used as an internal control. Quantitative values are indicated as ratios relative to the values of the vehicle-treated group. ATR, treatment with 20  $\mu\text{M}$  atorvastatin. GEM, treatment with  $1 \times 10^{-2}$   $\mu\text{M}$  gemcitabine. Both, combined treatment with 20  $\mu\text{M}$  atorvastatin and  $1 \times 10^{-2}$   $\mu\text{M}$  gemcitabine. Data are presented as the mean  $\pm$  SD ( $n = 10$ ). \*,  $p < 0.05$ ; \*\*,  $p < 0.01$ .

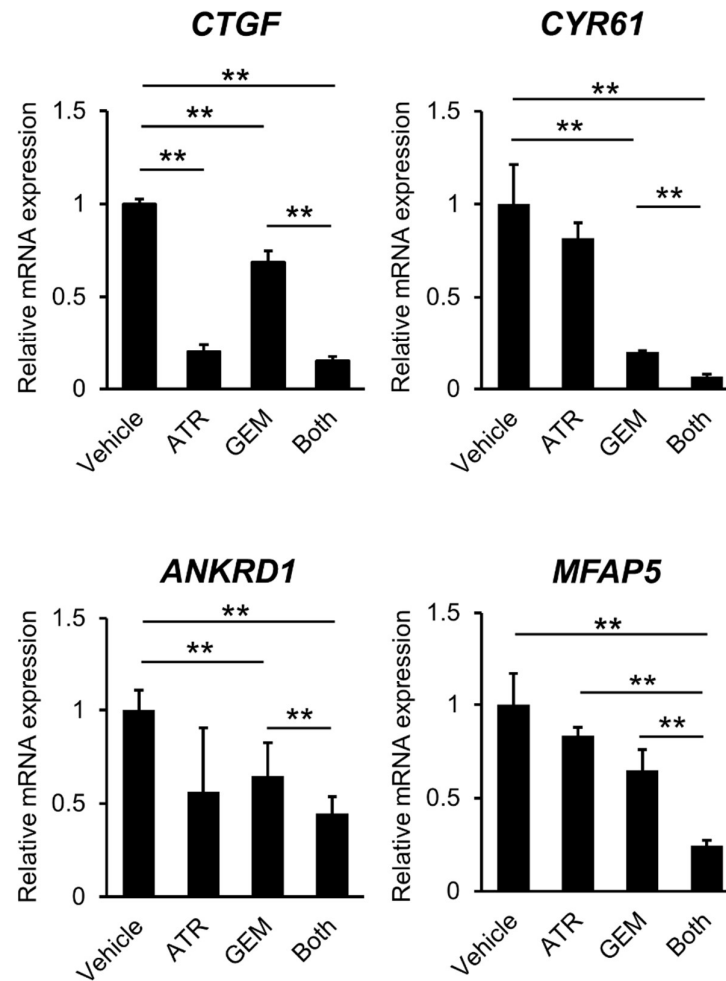

**Figure 2.** Effects of atorvastatin and gemcitabine on the expression of Yes-associated protein (YAP)/TEA domain (TEAD) target genes in cultured KKKU-M213 cells. Relative mRNA levels of the YAP/TEAD target genes CTGF, CYR61, ANKRD1, and MFAP5 in cultured KKKU-M213 cells. The mRNA expression levels were measured using quantitative real-time PCR, and glyceraldehyde-3-phosphate dehydrogenase was used as an internal control. Quantitative values are indicated as ratios relative to the values of the vehicle-treated group. ATR, treatment with 20  $\mu$ M atorvastatin. GEM, treatment with  $1 \times 10^{-2}$   $\mu$ M gemcitabine. Both, combined treatment with 20  $\mu$ M atorvastatin and  $1 \times 10^{-2}$   $\mu$ M gemcitabine. Data are presented as the mean  $\pm$  SD ( $n = 10$ ). \*,  $p < 0.05$ ; \*\*,  $p < 0.01$ .

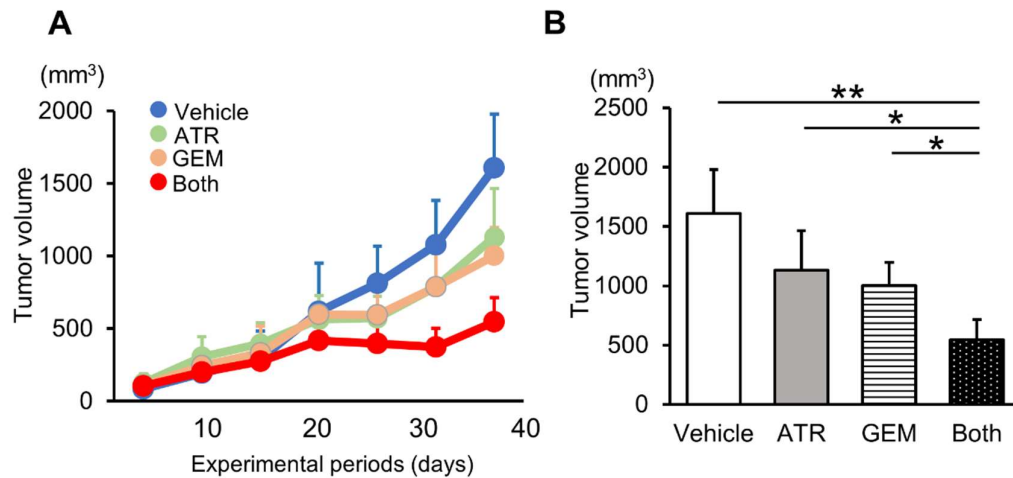

**Figure 3. Gemcitabine plus atorvastatin suppressed K KU-M213 cell-derived tumor growth in nude mice.** (A) K KU-M213 cell-derived xenograft tumors grew progressively in vehicle-treated control mice, but they grew more slowly in mice treated with either atorvastatin (100 mg/kg/day) or gemcitabine (100 mg/kg/3 days). (B) The mean tumor volumes in mice treated with atorvastatin and/or gemcitabine. ATR, atorvastatin-treated mice. GEM, gemcitabine-treated mice. Both, mice treated with both atorvastatin and gemcitabine. Data are presented as the mean  $\pm$  SD ( $n = 10$ ). \*,  $p < 0.05$ ; \*\*,  $p < 0.01$ .
